# Supplementary material for: Early-Stage Mapping of Winter Canola by Combining Sentinel-1 and Sentinel-2 Data in Jianghan Plain China
Source: Preprints.org preprint supplement (doi:10.20944/preprints202406.0464.v1), 2024-06-07
Supplement: Supplementary file 1 [file supplementary]

Supplementary Material for

**Early-season mapping of winter canola by combining Sentinel-1 and Sentinel-2 data**

Tingting Liu1, Peipei Li 2 , Feng Zhao 3 , Jie Liu1 and Ran Meng1,4*

1 Artificial Intelligence Research Institute Co., Ltd, School of Computer Science and Technology, Harbin Institute of Technology, Harbin 150000, China; hzauliutingting@gmail.com

2 College of Resources and Environment, Huazhong Agricultural University, Wuhan 430070, China; 18229880838@163.com

3 Key Laboratory of Sustainable Forest Ecosystem Management-Ministry of Education/College of Forestry, Northeast Forestry University, Harbin 150040, China; peakzhao424@hotmail.com

4 National Key Laboratory of Smart Farm Technologies and Systems, Harbin 150000, China;

***** Correspondence: mengran@hit.edu.cn;

Table of contents

[Table S1. 1](#_Toc161566126)

[Table S2.. 2](#_Toc161566127)

[Table S3 2](#_Toc161566128)

Figure of contents

[Figure S1. 3](#_Toc161566141)

[Figure S2.. 3](#_Toc161566142)

[Figure S3.. 4](#_Toc161566143)

[Figure S4. 4](#_Toc161566144)

[Figure S5. 4](#_Toc161566145)

**Table S1**. Description of the number of Sentinel-1 satellite images used in the study.

| **Satellite platform** | **Image date** | **Image numbers** | **phenological stage** |
| --- | --- | --- | --- |
| Sentinel-1 | 2016.12.01-2016.12.09 | 5 | Seeding |
| Sentinel-1 | 2016.12.20-2016.12.31 | 5 | Overwinter |
| Sentinel-1 | 2017.01.20-2017.01.31 | 5 | Early-bolting |
| Sentinel-1 | 2017.02.11-2017.02.20 | 5 | Later-bolting |
| Sentinel-1 | 2017.03.19-2017.03.30 | 6 | Flowering |
| Sentinel-1 | 2017.12.20-2017.12.31 | 6 | Overwinter |
| Sentinel-1 | 2019.1.20-2019.1.31 | 6 | Early-bolting |
| Sentinel-1 | 2019.12.20-2019.12.31 | 6 | Overwinter |
| Sentinel-1 | 2020.12.20-2020.12.31 | 5 | Overwinter |
| Sentinel-1 | 2021.12.20-2021.12.31 | 6 | Overwinter |

**Table S2.** Description of the number of Sentinel-2 satellite images used in the study.

| **Satellite platform** | **Image date** | **Number of images (Before selecting)** | **Number of images**  **(After selecting)** |
| --- | --- | --- | --- |
| Sentinel-2 | 2016.12.01-2016.12.09 | 28 | 22 |
| Sentinel-2 | 2016.12.20-2016.12.31 | 13 | 11 |
| Sentinel-2 | 2017.02.20-2017.02.28 | 18 | 13 |
| Sentinel-2 | 2017.12.20-2017.12.31 | 31 | 20 |
| Sentinel-2 | 2019.12.04-2019.12.31 | 135 | 42 |
| Sentinel-2 | 2020.12.20-2021.1.12 | 102 | 58 |
| Sentinel-2 | 2021.12.20-2021.12.31 | 60 | 42 |

**Table S3** Spectral indexes

| **Spectral indexes** | **Formula** | **Citation** |
| --- | --- | --- |
| ARVI | (N-(2*R)+B)/(N+(2*R)+B) | (Pen Uelas et al. 1995) |
| DVI | N-R | (Jordan 1969) |
| GARI | (N-(G-1.7*(B-R)))/(N+(G-1.7*(B-R))) | (Gitelson et al. 1996) |
| GCI | N/G-1 | (Gitelson et al. 2002) |
| GLI | ((G-R)+(G-B))/((2*G)+R+B) | (Eng et al. 2019) |
| GNDVI | (N-G)/(N+G) | (Sripada 2005) |
| GOSAVI | (N-G)/(N+G+0.16) | (Tucker 1979) |
| GRVI | N/G | (Pearson and Miller 1972) |
| GSAVI | 1.5*(N-G)/(N+G+0.5) | (Crippen 1990) |
| IPVI | N/(N+R) | (Ruimy et al. 1994) |
| NDWI | (G-N)/(G+N) | (Broge and Leblanc 2001) |
| NDYI | (G-B)/(G+B) | (Sulik and Long 2015) |
| RVI | N/R | (Gao 1996) |
| SAVI | (1.5*(N-R))/(N+R+0.5) | (Bannari et al. 2002) |
| SIPI | (N-B)/(N-R) | (Vapnik 1999) |
| Canola Index (CI) | N * (R + G) | (Ashourloo et al. 2019) |


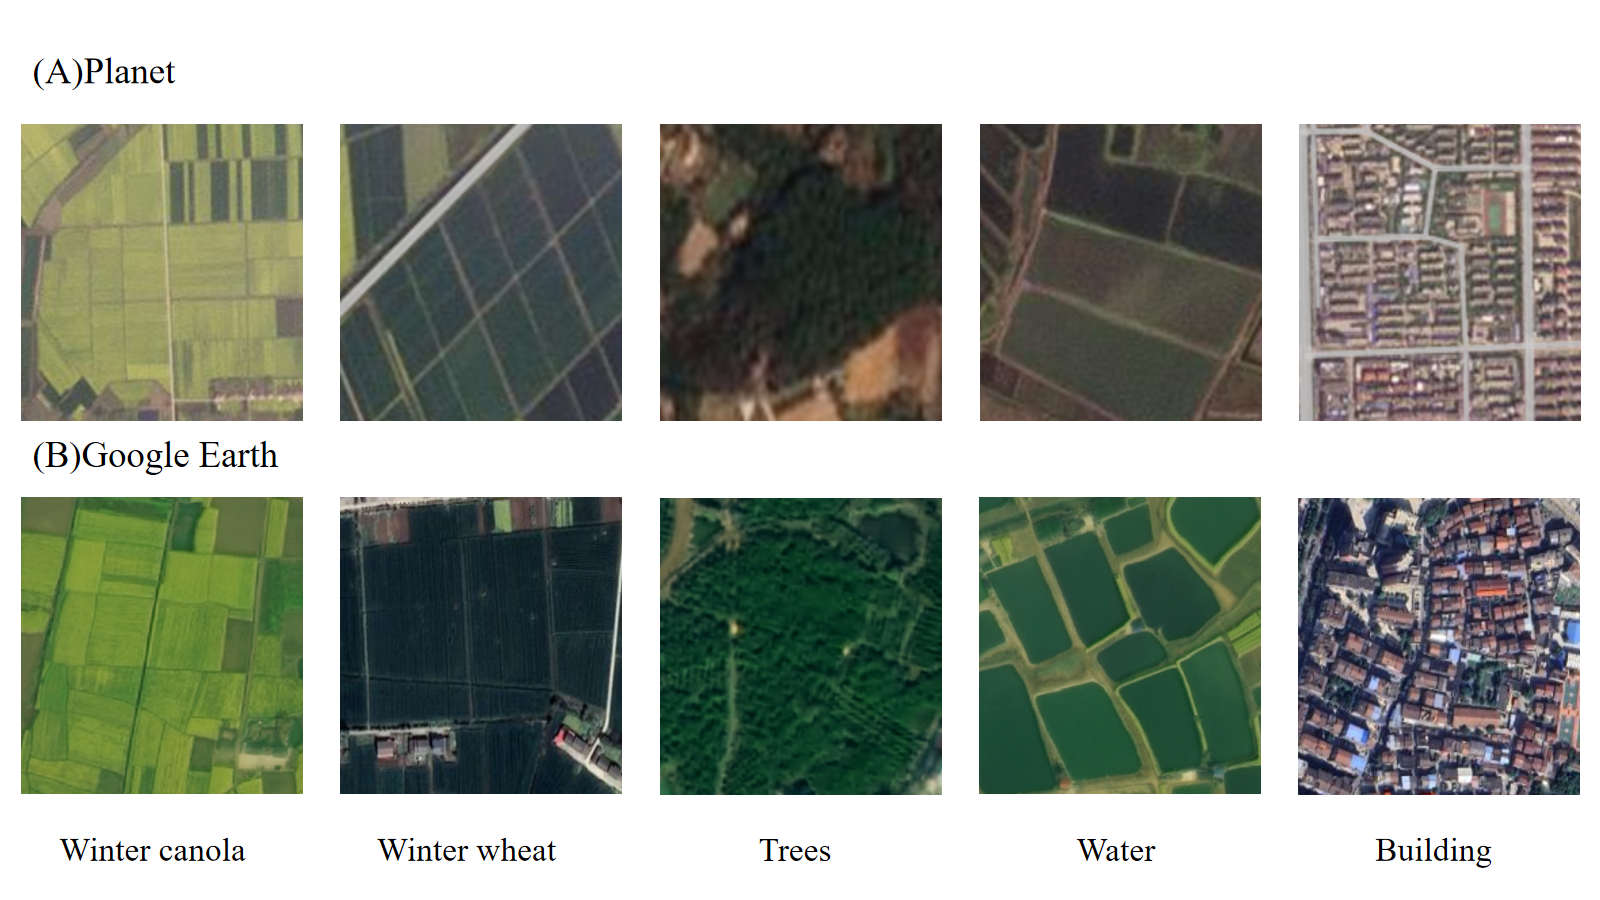


**Figure S1**. Five sample images from Planet and Google Earth


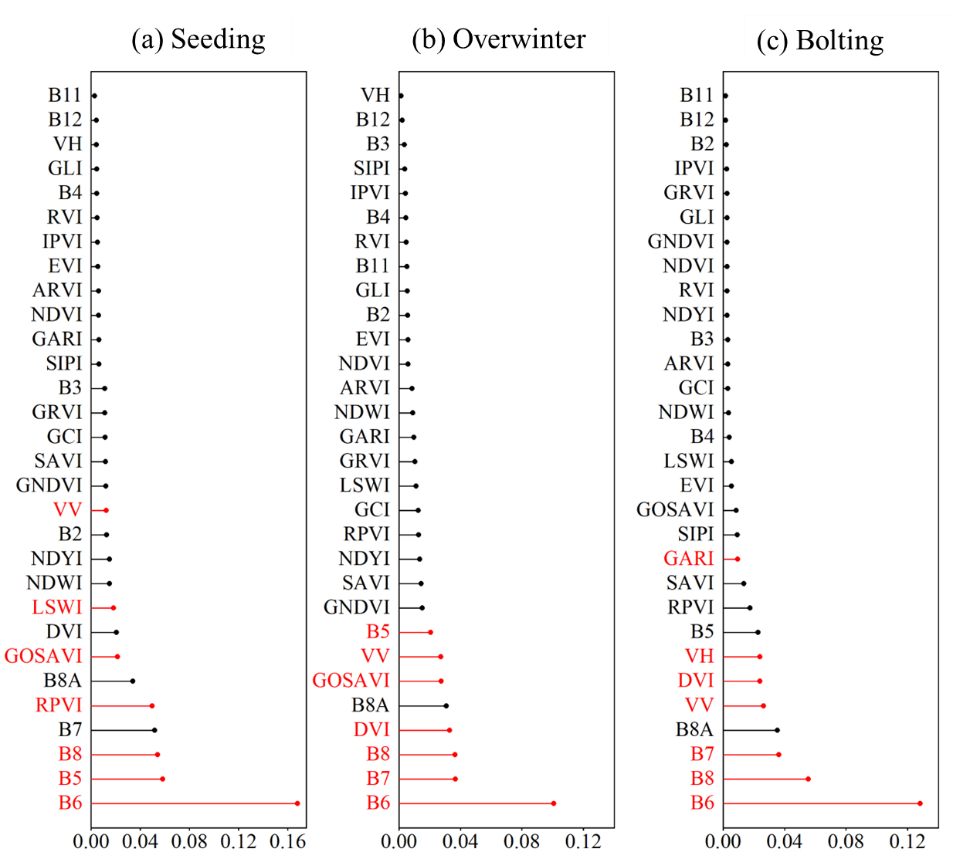


**Figure S2**. Importance of features at different winter canola phenological stages based on Sentinel-2 and Sentinel-1.


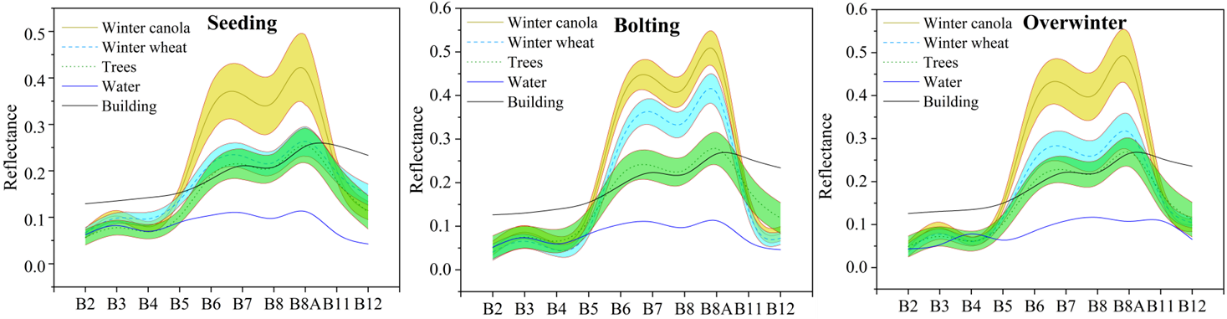


**Figure S3.** Spectral curves of different land types at different phenological stages.


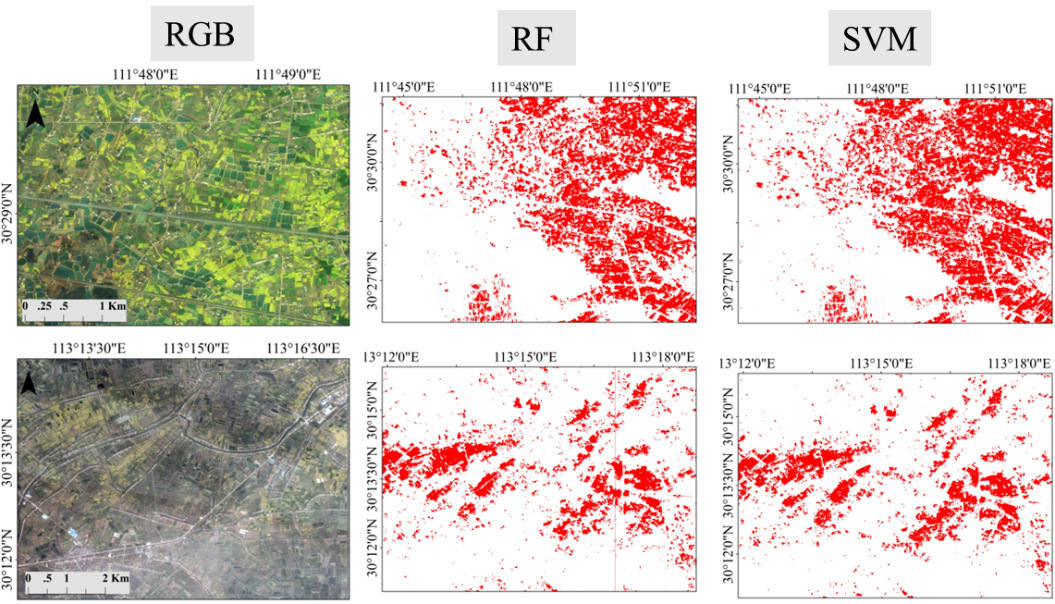


**Figure S4**. The spatial details of the winter canola map at the overwinter stage in 2017


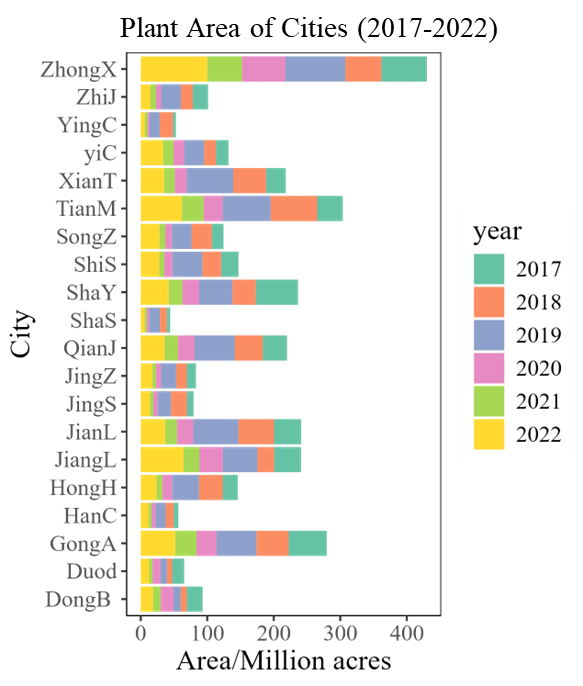


**Figure S5.** Winter canola area in each city of Jianghan Plain in 2017–2022.

**References**

1. Ashourloo, D., Shahrabi, H.S., Azadbakht, M., Aghighi, H., Nematollahi, H., Alimohammadi, A., & Matkan, A.A. (2019). Automatic canola mapping using time series of sentinel 2 images. *ISPRS Journal of Photogrammetry and Remote Sensing, 156*, 63-76
2. Bannari, A., Asalhi, H., & Teillet, P.M. (2002). Transformed difference vegetation index (TDVI) for vegetation cover mapping. In, *IEEE International geoscience and remote sensing symposium* (pp. 3053-3055). Toronto, ON, Canada: IEEE
3. Broge, N.H., & Leblanc, E. (2001). Comparing prediction power and stability of broadband and hyperspectral vegetation indices for estimation of green leaf area index and canopy chlorophyll density. *Remote sensing of environment, 76*, 156-172
4. Crippen, R.E. (1990). Calculating the vegetation index faster. *Remote sensing of environment, 34*, 71-73
5. Eng, L.S., Ismail, R., Hashim, W., & Baharum, A. (2019). The use of VARI, GLI, and VIgreen formulas in detecting vegetation in aerial images. *International Journal of Technology, 10*, 1385-1394
6. Gao, B.C. (1996). NDWI—A normalized difference water index for remote sensing of vegetation liquid water from space. *Remote sensing of environment, 58*, 257-266
7. Gitelson, A.A., Kaufman, Y.J., & Merzlyak, M.N. (1996). Use of a green channel in remote sensing of global vegetation from EOS-MODIS. *Remote sensing of environment, 58*, 289-298
8. Gitelson, A.A., Kaufman, Y.J., Stark, R., & Rundquist, D. (2002). Novel algorithms for remote estimation of vegetation fraction. *Remote sensing of environment, 80*, 76-87
9. Jordan, C.F. (1969). Derivation of leaf‐area index from quality of light on the forest floor. *Ecology, 50*, 663-666
10. Pearson, R.L., & Miller, L.D. (1972). Remote mapping of standing crop biomass for estimation of the productivity of the shortgrass prairie. *Remote sensing of environment*, 1355
11. Pen Uelas, J., Filella, I., Lloret, P., Mun Oz, F., & Vilajeliu, M. (1995). Reflectance assessment of mite effects on apple trees. *International Journal of Remote Sensing, 16*, 2727-2733
12. Ruimy, A., Saugier, B., & Dedieu, G. (1994). Methodology for the estimation of terrestrial net primary production from remotely sensed data. *Journal of Geophysical Research: Atmospheres, 99*, 5263-5283
13. Sripada, R.P. (2005). *Determining in-season nitrogen requirements for corn using aerial color-infrared photography*. North Carolina State University
14. Sulik, J.J., & Long, D.S. (2015). Spectral indices for yellow canola flowers. *International Journal of Remote Sensing, 36*, 2751-2765
15. Tucker, C.J. (1979). Red and photographic infrared linear combinations for monitoring vegetation. *Remote sensing of environment, 8*, 127-150
16. Vapnik, V.N. (1999). An overview of statistical learning theory. *IEEE transactions on neural networks, 10*, 988-999
